# Supplementary material for: A cellular and regulatory map of the cholinergic nervous system of C. elegans
Source: eLife journal article supplement (doi:10.7554/elife.12432), 2015-12-25
Supplement: supp [file elife_poa_e12432_Figure_1_figure_supplement_2.pdf › elife_poa_e12432_Figure_1_figure_supplement_2.pdf]

A

*cho-1<sup>fsmid</sup>::mChOpti; unc-17<sup>fsmid</sup>::gfp*

anterior bulb

posterior bulb

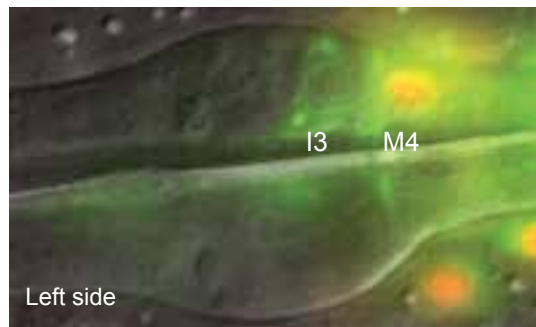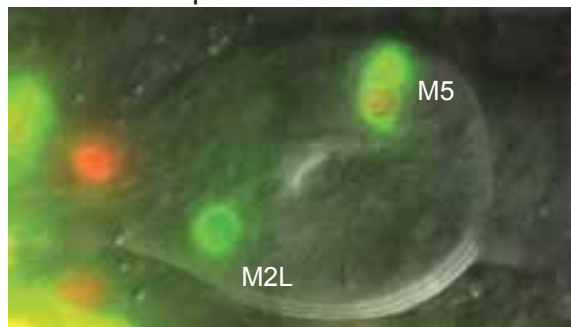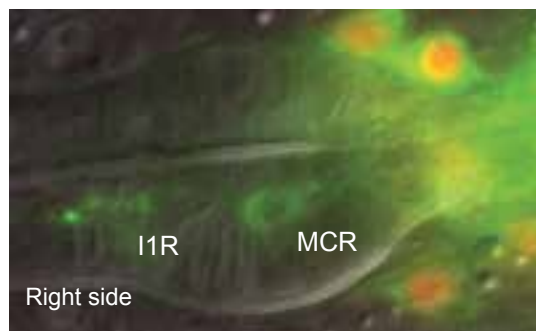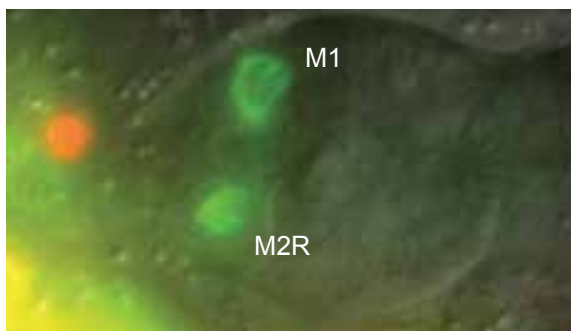

B

*eat-4<sup>fsmid</sup>::mChOpti; cho-1<sup>fsmid</sup>::yfp*

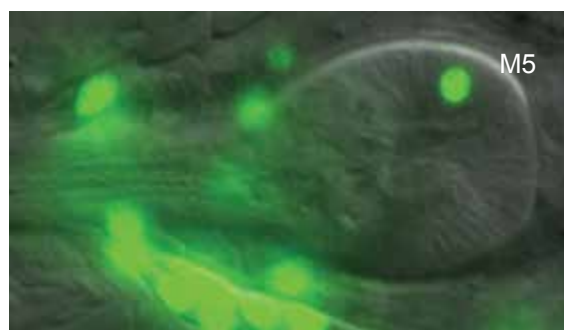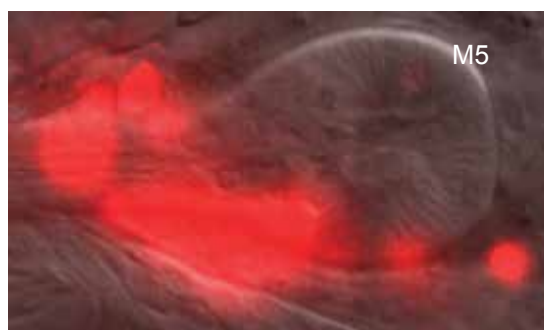

Figure 1 - figure supplement 2
