# Supplementary material for: A cellular and regulatory map of the cholinergic nervous system of C. elegans
Source: eLife journal article supplement (doi:10.7554/elife.12432), 2015-12-25
Supplement: supp [file elife_poa_e12432_Figure_6_figure_supplement_1.pdf › elife_poa_e12432_Figure_6_figure_supplement_1.pdf]

*cho-1<sup>fsmid</sup>::mChOpti; ceh-14<sup>fsmid</sup>::gfp*

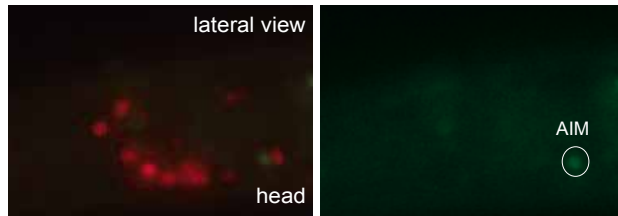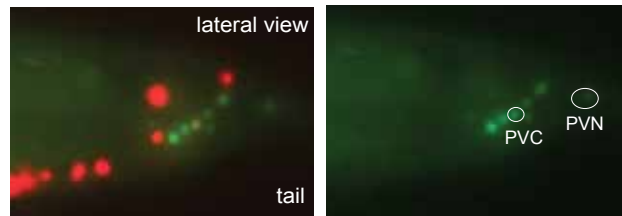

*cho-1<sup>fsmid</sup>::mChOpti; lin-11<sup>fsmid</sup>::gfp*

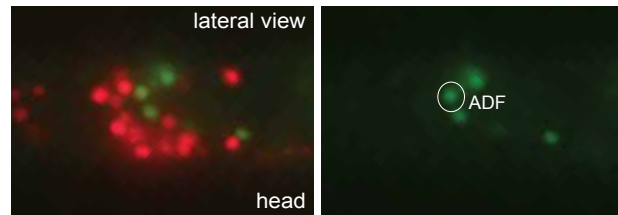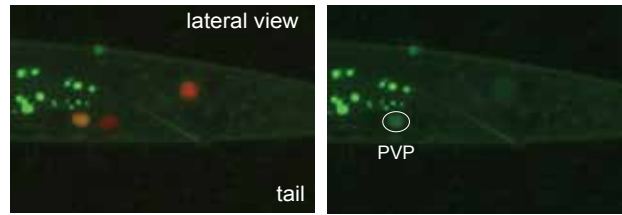

*cho-1<sup>fsmid</sup>::mChOpti; unc-86<sup>fsmid</sup>::gfp*

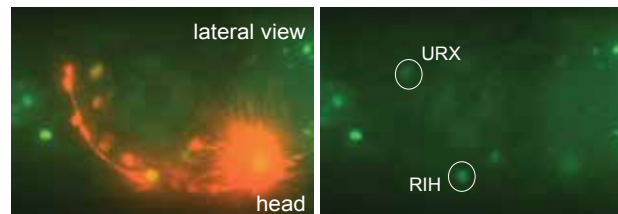

*cho-1<sup>fsmid</sup>::mChOpti; unc-30<sup>fsmid</sup>::gfp*

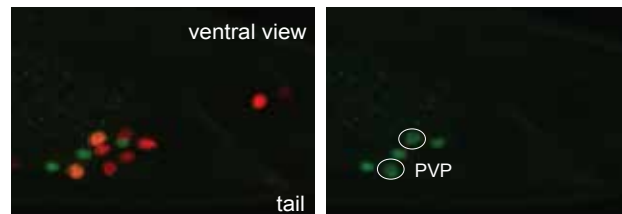

*cho-1<sup>fsmid</sup>::mChOpti; unc-42<sup>fsmid</sup>::gfp*

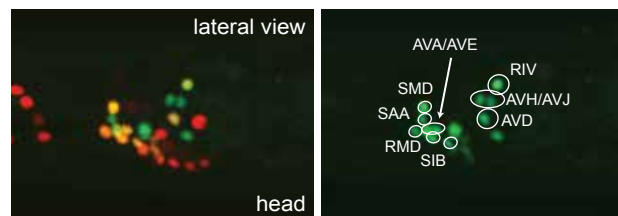

Figure 6 - figure supplement 1
