# Supplementary figures and images for: A cellular and regulatory map of the cholinergic nervous system of C. elegans
Source: eLife journal article supplement (doi:10.7554/elife.12432), 2015-12-25

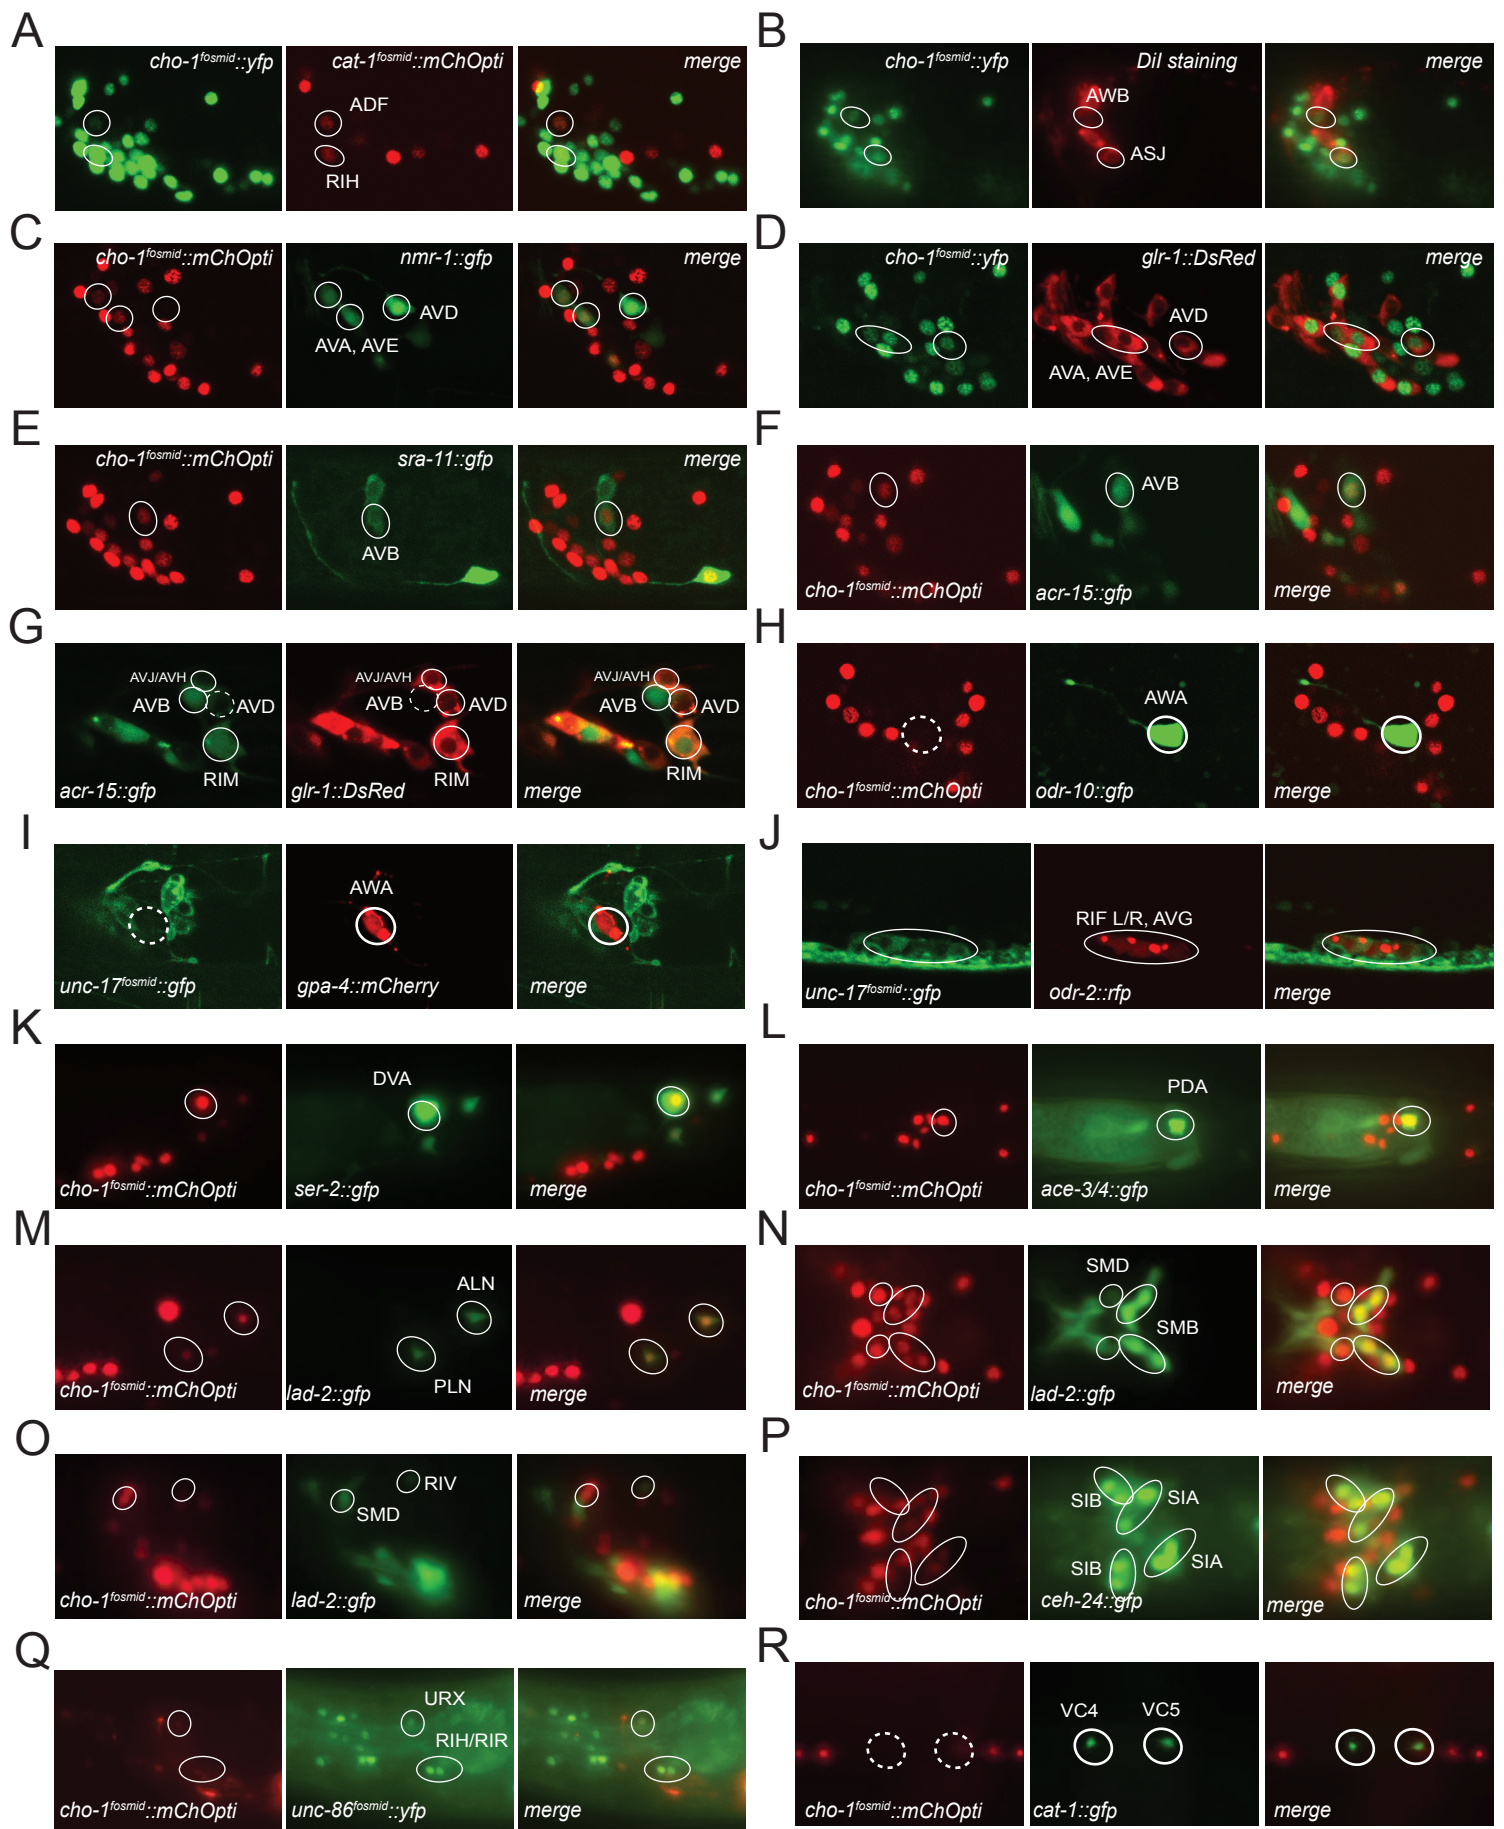

Figure 1 - figure supplement 1

Supplement: supp [file elife_poa_e12432_Figure_1_figure_supplement_1.pdf › elife_poa_e12432_Figure_1_figure_supplement_1.pdf]

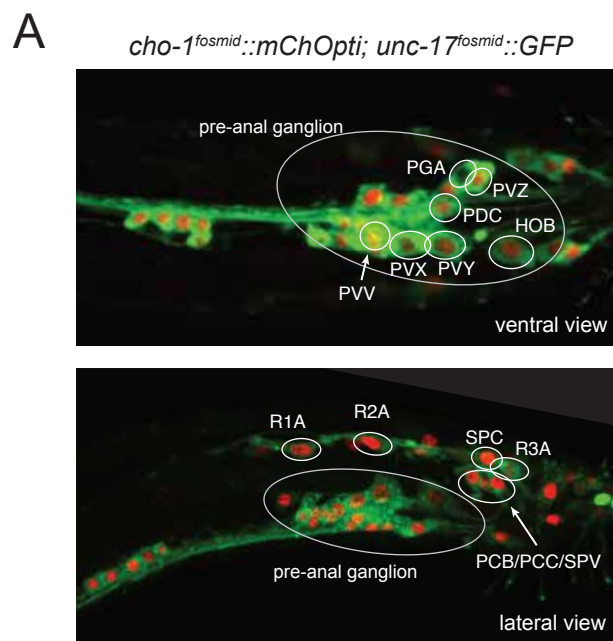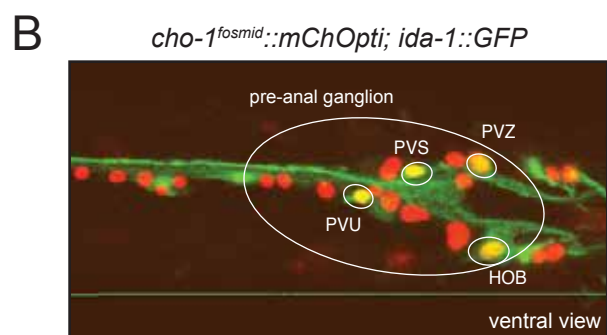

Figure 1 - figure supplement 3

Supplement: supp [file elife_poa_e12432_Figure_1_figure_supplement_3.pdf › elife_poa_e12432_Figure_1_figure_supplement_3.pdf]

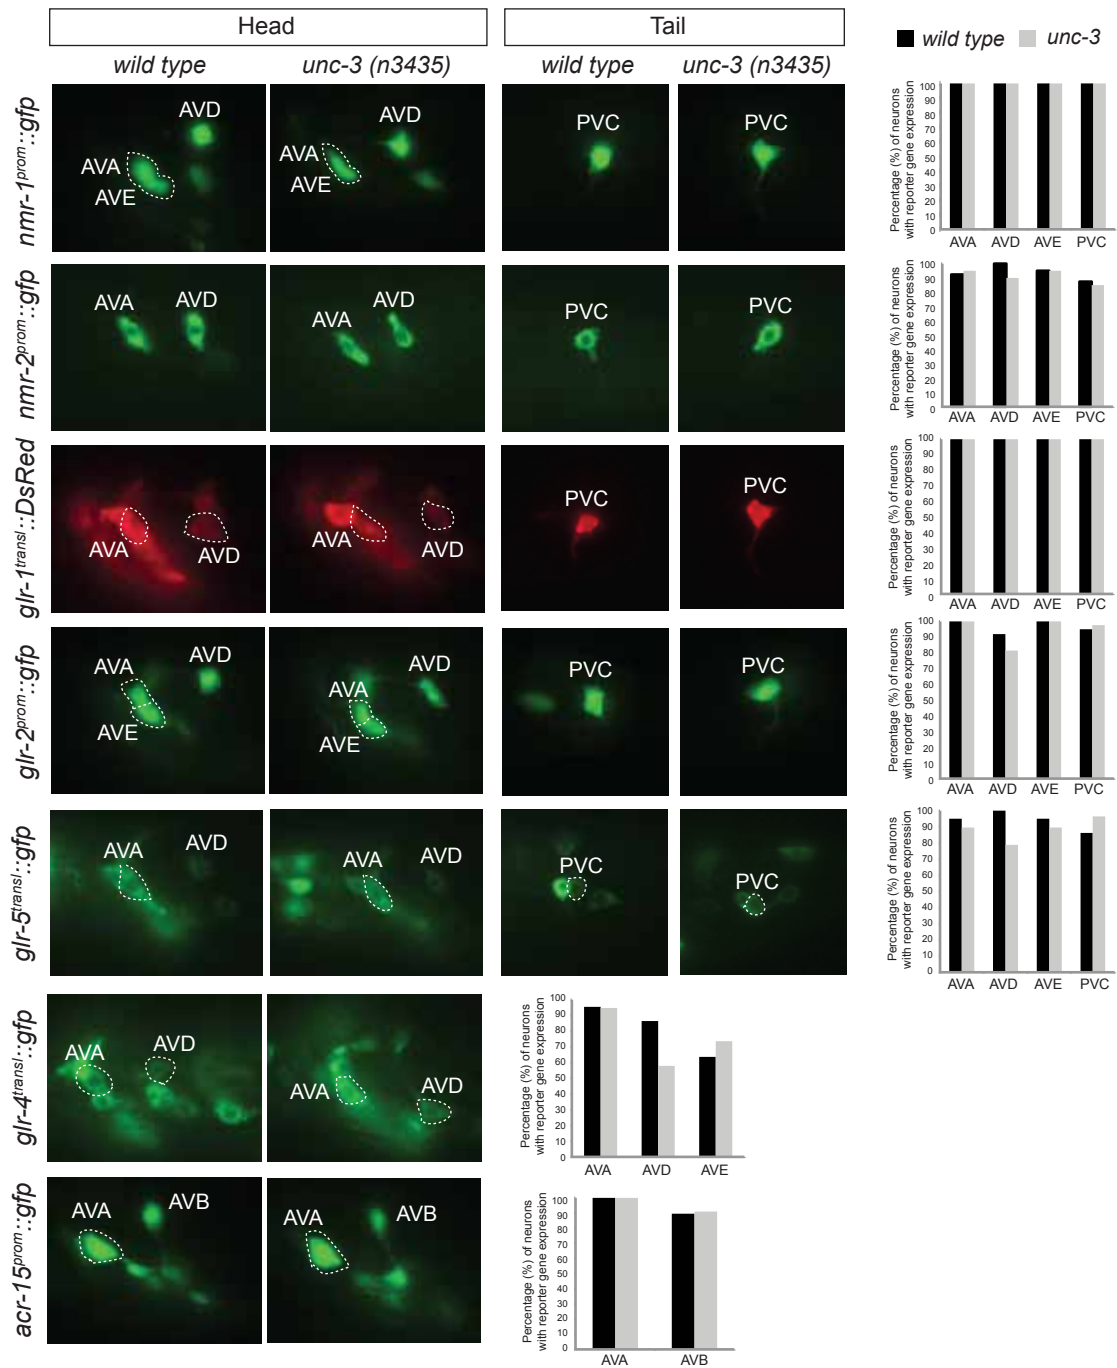

Figure 7 - figure supplement 1

Supplement: supp [file elife_poa_e12432_Figure_7_figure_supplement_1.pdf › elife_poa_e12432_Figure_7_figure_supplement_1.pdf]
